# Supplementary material for: Femoral µCT Analysis, Mechanical Testing and Immunolocalization of Bone Proteins in β-Hydroxy β-Methylbutyrate (HMB) Supplemented Spiny Mouse in a Model of Pregnancy and Lactation-Associated Osteoporosis
Source: MDPI journal article supplement (doi:10.3390/jcm10214808), 2021-10-20
Supplement: s1 [file s1]

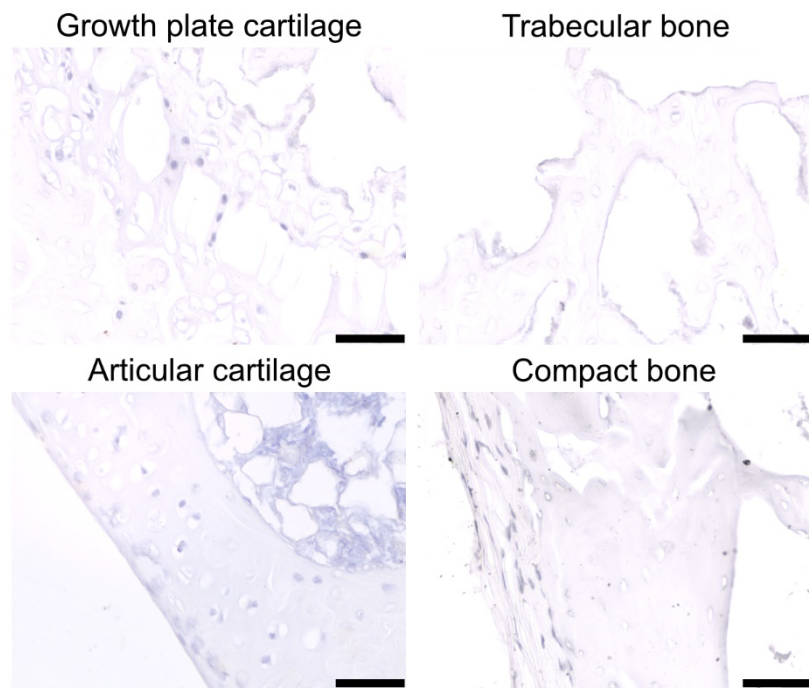

**Figure S1.** Representative pictures of the antibody control for all immunohistochemical reactions developed in 3,3'-diaminobenzidine tetrahydrochloride (DAB); counterstaining performed with Mayer's hematoxylin. All the scale bars represent 50 μm.

**Table S1.** Effect of HMB supplementation (0.02 g/kg b.w.) during the middle trimester of pregnancy (13–26 d) on the intensity of immunoreactions (pixel value) against bone turnover proteins in the growth plate cartilage of spiny mice femora.

| Treatment                    | OPG      | OC                    | BMP-2                | TIMP-2                 | MMP-8    | MMP-13               |
|------------------------------|----------|-----------------------|----------------------|------------------------|----------|----------------------|
| Main effect supplementation  |          |                       |                      |                        |          |                      |
| Control                      | 127 ± 12 | 93 ± 29               | 62 ± 20              | 110 ± 15               | 85 ± 13  | 77 ± 20              |
| HMB                          | 120 ± 23 | 64 ± 6                | 62 ± 8               | 107 ± 14               | 110 ± 12 | 51 ± 110             |
| Main effect period           |          |                       |                      |                        |          |                      |
| Delivery                     | 138 ± 9  | 64 ± 6                | 66 ± 17              | 118 ± 10               | 89 ± 20  | 54 ± 10              |
| Lactation                    | 109 ± 13 | 92 ± 30               | 58 ± 12              | 98 ± 11                | 106 ± 12 | 75 ± 23              |
| treatment effect             |          |                       |                      |                        |          |                      |
| Control delivery (CONT-D)    | 138 ± 5  | 65 ± 6 <sup>a</sup>   | 76 ± 18 <sup>b</sup> | 123 ± 5 <sup>c</sup>   | 73 ± 7   | 60 ± 7 <sup>a</sup>  |
| Control lactation (CONT-L)   | 117 ± 5  | 120 ± 11 <sup>b</sup> | 47 ± 3 <sup>a</sup>  | 96 ± 6 <sup>a</sup>    | 97 ± 5   | 95 ± 7 <sup>b</sup>  |
| HMB delivery (HMB-D)         | 137 ± 12 | 63 ± 7 <sup>a</sup>   | 55 ± 3 <sup>a</sup>  | 113 ± 12 <sup>bc</sup> | 105 ± 14 | 48 ± 10 <sup>a</sup> |
| HMB lactation (HMB-L)        | 102 ± 15 | 65 ± 5 <sup>a</sup>   | 69 ± 5 <sup>b</sup>  | 101 ± 14 <sup>ab</sup> | 115 ± 8  | 54 ± 10 <sup>a</sup> |
| Pooled SEM                   | 3.6      | 2.6                   | 3.5                  | 3.5                    | 3.3      | 3.0                  |
| Main effects and interaction |          |                       |                      |                        |          |                      |
| Supplementation (S)          | 0.042    | <0.001                | 0.908                | 0.401                  | <0.001   | <0.001               |
| Period (P)                   | <0.001   | <0.001                | 0.036                | <0.001                 | <0.001   | <0.001               |
| S × P                        | 0.069    | <0.001                | <0.001               | 0.047                  | 0.050    | <0.001               |

OPG: osteoprotegerin; OC: osteocalcin; BMP-2: bone morphogenetic protein 2; TIMP-2: tissue inhibitor of metalloproteinases 2; MMP8: matrix metalloproteinase 8;

MMP-13: matrix metalloproteinase 13.

CONT-D: control pregnant females at delivery; CONT-L: control pregnant females after the lactation period; HMB-D: pregnant HMB females at delivery; HMB-L: pregnant HMB females after the lactation period.

Data shows the pixel value of 8-bit grey-scale digital images, with a scale from 0 (white pixel) to 255 (black pixel), where the higher the pixel value, the higher the intensity of the immunohistochemical reaction.

Data are presented as lsmeans ± standard deviation. SEM: standard error of the means. <sup>a, b, c</sup> - mean values in rows with different letters differ significantly at P < 0.05.

**Table S2.** Effect of HMB supplementation (0.02 g/kg b.w.) during the middle trimester of pregnancy (13–26 d) on the intensity of immunoreactions (pixel value) against bone turnover proteins in the trabecular bone of spiny mice femora.

| Treatment                    | OPG                    | OC                   | BMP-2                | TIMP-2                | MMP-8               | MMP-13               |
|------------------------------|------------------------|----------------------|----------------------|-----------------------|---------------------|----------------------|
| Main effect supplementation  |                        |                      |                      |                       |                     |                      |
| Control                      | 119 ± 12               | 111 ± 16             | 88 ± 10              | 106 ± 9               | 80 ± 20             | 77 ± 13              |
| HMB                          | 113 ± 11               | 79 ± 10              | 74 ± 30              | 125 ± 14              | 66 ± 7              | 88 ± 25              |
| Main effect period           |                        |                      |                      |                       |                     |                      |
| Delivery                     | 119 ± 12               | 87 ± 13              | 62 ± 18              | 119 ± 19              | 61 ± 5              | 65 ± 3               |
| Lactation                    | 113 ± 11               | 102 ± 25             | 100 ± 6              | 112 ± 8               | 85 ± 15             | 101 ± 13             |
| treatment effect             |                        |                      |                      |                       |                     |                      |
| Control delivery (CONT-D)    | 126 ± 12 <sup>b</sup>  | 96 ± 2 <sup>b</sup>  | 79 ± 4 <sup>b</sup>  | 104 ± 9 <sup>a</sup>  | 61 ± 6 <sup>a</sup> | 66 ± 4 <sup>a</sup>  |
| Control lactation (CONT-L)   | 112 ± 5 <sup>a</sup>   | 125 ± 7 <sup>c</sup> | 97 ± 3 <sup>c</sup>  | 108 ± 8 <sup>a</sup>  | 99 ± 2 <sup>c</sup> | 89 ± 7 <sup>b</sup>  |
| HMB delivery (HMB-D)         | 112 ± 7 <sup>a</sup>   | 79 ± 13 <sup>a</sup> | 46 ± 5 <sup>a</sup>  | 134 ± 13 <sup>b</sup> | 61 ± 3 <sup>a</sup> | 65 ± 3 <sup>a</sup>  |
| HMB lactation (HMB-L)        | 115 ± 15 <sup>ab</sup> | 79 ± 7 <sup>a</sup>  | 103 ± 7 <sup>c</sup> | 115 ± 6 <sup>a</sup>  | 72 ± 5 <sup>b</sup> | 112 ± 4 <sup>c</sup> |
| Pooled SEM                   | 3.7                    | 2.9                  | 1.7                  | 3.4                   | 1.6                 | 1.7                  |
| Main effects and interaction |                        |                      |                      |                       |                     |                      |
| Supplementation              | 0.121                  | <0.001               | <0.001               | <0.001                | <0.001              | <0.001               |
| Period                       | 0.133                  | <0.001               | <0.001               | 0.043                 | <0.001              | <0.001               |
| S × P                        | 0.026                  | <0.001               | <0.001               | 0.002                 | <0.001              | <0.001               |

OPG: osteoprotegerin; OC: osteocalcin; BMP-2: bone morphogenetic protein 2; TIMP-2: tissue inhibitor of metalloproteinases 2; MMP8: matrix metalloproteinase 8;

MMP-13: matrix metalloproteinase 13.

CONT-D: control pregnant females at delivery; CONT-L: control pregnant females after the lactation period; HMB-D: pregnant HMB females at delivery; HMB-L: pregnant HMB females after the lactation period.

Data shows the pixel value of 8-bit grey-scale digital images, with a scale from 0 (white pixel) to 255 (black pixel), where the higher the pixel value, the higher the intensity of the immunohistochemical reaction.

Data are presented as  $\text{lsmeans} \pm \text{standard deviation}$ . SEM: standard error of the means. <sup>a, b, c</sup> - mean values in rows with different letters differ significantly at  $P < 0.05$ .

**Table S3.** Effect of HMB supplementation (0.02 g/kg b.w.) during the middle trimester of pregnancy (13–26 d) on the intensity of immunoreactions (pixel value) against bone turnover proteins in the compact bone of spiny mice femora.

| Treatment                    | OPG                   | OC                   | BMP-2                | TIMP-2                | MMP-8   | MMP-13                |
|------------------------------|-----------------------|----------------------|----------------------|-----------------------|---------|-----------------------|
| Main effect supplementation  |                       |                      |                      |                       |         |                       |
| Control                      | 133 ± 16              | 119 ± 50             | 71 ± 11              | 131 ± 11              | 71 ± 19 | 88 ± 10               |
| HMB                          | 92 ± 13               | 78 ± 13              | 83 ± 14              | 123 ± 17              | 61 ± 8  | 90 ± 25               |
| Main effect period           |                       |                      |                      |                       |         |                       |
| Delivery                     | 116 ± 19              | 80 ± 12              | 73 ± 11              | 118 ± 13              | 57 ± 7  | 80 ± 15               |
| Lactation                    | 108 ± 31              | 117 ± 52             | 81 ± 16              | 136 ± 10              | 75 ± 17 | 98 ± 19               |
| treatment effect             |                       |                      |                      |                       |         |                       |
| Control delivery (CONT-D)    | 130 ± 13 <sup>c</sup> | 71 ± 7 <sup>a</sup>  | 74 ± 15 <sup>a</sup> | 127 ± 10 <sup>b</sup> | 59 ± 7  | 94 ± 8 <sup>c</sup>   |
| Control lactation (CONT-L)   | 136 ± 19 <sup>c</sup> | 168 ± 5 <sup>c</sup> | 67 ± 4 <sup>a</sup>  | 135 ± 12 <sup>b</sup> | 83 ± 21 | 81 ± 7 <sup>b</sup>   |
| HMB delivery (HMB-D)         | 102 ± 10 <sup>b</sup> | 89 ± 8 <sup>b</sup>  | 71 ± 7 <sup>a</sup>  | 109 ± 9 <sup>a</sup>  | 55 ± 6  | 66 ± 3 <sup>a</sup>   |
| HMB lactation (HMB-L)        | 81 ± 5 <sup>a</sup>   | 67 ± 7 <sup>a</sup>  | 95 ± 11 <sup>b</sup> | 137 ± 8 <sup>b</sup>  | 67 ± 4  | 114 ± 10 <sup>d</sup> |
| Pooled SEM                   | 4.6                   | 2.4                  | 3.6                  | 3.5                   | 4.0     | 2.7                   |
| Main effects and interaction |                       |                      |                      |                       |         |                       |
| Supplementation              | <0.001                | <0.001               | 0.002                | 0.036                 | 0.016   | 0.354                 |
| Period                       | 0.098                 | <0.001               | 0.027                | <0.001                | <0.001  | <0.001                |
| S × P                        | 0.008                 | <0.001               | <0.001               | 0.007                 | 0.174   | <0.001                |

OPG: osteoprotegerin; OC: osteocalcin; BMP-2: bone morphogenetic protein 2; TIMP-2: tissue inhibitor of metalloproteinases 2; MMP8: matrix metalloproteinase 8;

MMP-13: matrix metalloproteinase 13.

CONT-D: control pregnant females at delivery; CONT-L: control pregnant females after the lactation period; HMB-D: pregnant HMB females at delivery; HMB-L: pregnant HMB females after the lactation period.

Data shows the pixel value of 8-bit grey-scale digital images, with a scale from 0 (white pixel) to 255 (black pixel), where the higher the pixel value, the higher the intensity of the immunohistochemical reaction.

Data are presented as lsmeans ± standard deviation. SEM: standard error of the means. <sup>a, b, c, d</sup> - mean values in rows with different letters differ significantly at P < 0.05.

**Table S4.** Effect of HMB supplementation (0.02 g/kg b.w.) during the middle trimester of pregnancy (13–26 d) on the intensity of immunoreactions (pixel value) against bone turnover proteins in the articular cartilage of spiny mice femora.

| Treatment                    | OPG                   | OC                    | BMP-2                 | TIMP-2   | MMP-8                 | MMP-13                |
|------------------------------|-----------------------|-----------------------|-----------------------|----------|-----------------------|-----------------------|
| Main effect supplementation  |                       |                       |                       |          |                       |                       |
| Control                      | 193 ± 22              | 163 ± 38              | 124 ± 19              | 159 ± 13 | 86 ± 10               | 152 ± 31              |
| HMB                          | 208 ± 17              | 106 ± 14              | 148 ± 39              | 182 ± 16 | 109 ± 11              | 167 ± 19              |
| Main effect period           |                       |                       |                       |          |                       |                       |
| Delivery                     | 208 ± 18              | 118 ± 14              | 125 ± 17              | 163 ± 14 | 94 ± 20               | 167 ± 19              |
| Lactation                    | 193 ± 21              | 152 ± 50              | 146 ± 41              | 177 ± 50 | 101 ± 9               | 152 ± 31              |
| treatment effect             |                       |                       |                       |          |                       |                       |
| Control delivery (CONT-D)    | 209 ± 16 <sup>b</sup> | 127 ± 5 <sup>b</sup>  | 136 ± 18 <sup>b</sup> | 153 ± 12 | 77 ± 6 <sup>a</sup>   | 173 ± 23 <sup>c</sup> |
| Control lactation (CONT-L)   | 179 ± 14 <sup>a</sup> | 199 ± 9 <sup>c</sup>  | 112 ± 12 <sup>a</sup> | 164 ± 11 | 94 ± 6 <sup>b</sup>   | 131 ± 21 <sup>a</sup> |
| HMB delivery (HMB-D)         | 206 ± 20 <sup>b</sup> | 108 ± 12 <sup>a</sup> | 115 ± 9 <sup>a</sup>  | 174 ± 7  | 111 ± 15 <sup>c</sup> | 161 ± 13 <sup>b</sup> |
| HMB lactation (HMB-L)        | 210 ± 13 <sup>b</sup> | 104 ± 15 <sup>a</sup> | 180 ± 28 <sup>c</sup> | 190 ± 19 | 108 ± 7 <sup>c</sup>  | 173 ± 23 <sup>c</sup> |
| Pooled SEM                   | 5.6                   | 3.9                   | 6.8                   | 4.6      | 3.2                   | 7.3                   |
| Main effects and interaction |                       |                       |                       |          |                       |                       |
| Supplementation              | 0.014                 | <0.001                | 0.001                 | <0.001   | <0.001                | 0.047                 |
| Period                       | 0.018                 | <0.001                | 0.003                 | 0.006    | 0.033                 | 0.052                 |
| S × P                        | 0.004                 | <0.001                | <0.001                | 0.585    | 0.005                 | 0.001                 |

OPG: osteoprotegerin; OC: osteocalcin; BMP-2: bone morphogenetic protein 2; TIMP-2: tissue inhibitor of metalloproteinases 2; MMP8: matrix metalloproteinase 8;

MMP-13: matrix metalloproteinase 13.

CONT-D: control pregnant females at delivery; CONT-L: control pregnant females after the lactation period; HMB-D: pregnant HMB females at delivery; HMB-L: pregnant HMB females after the lactation period.

Data shows the pixel value of 8-bit grey-scale digital images, with a scale from 0 (white pixel) to 255 (black pixel), where the higher the pixel value, the higher the intensity of the immunohistochemical reaction.

Data are presented as lsmeans ± standard deviation. SEM: standard error of the means. <sup>a, b, c</sup> - mean values in rows with different letters differ significantly at P < 0.05.
